# Supplementary material for: Foldable Perovskite Solar Cells Using Carbon Nanotube‐Embedded Ultrathin Polyimide Conductor
Source: PubMed Central journal article supplement (PMC8025023; doi:10.1002/advs.202004092), 2021-02-08
Supplement: ADVS-8-2004092-s001.pdf [file ADVS-8-2004092-s001.pdf]

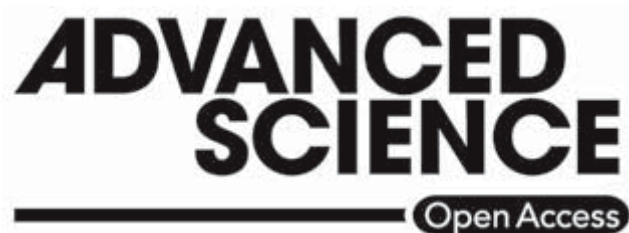

## Supporting Information

for *Adv. Sci.*, DOI: 10.1002/adv.202004092

### Foldable Perovskite Solar Cells Using Carbon Nanotube-Embedded Ultrathin Polyimide Conductor

*Jungjin Yoon, Unsoo Kim, Yongseok Yoo, Junseop Byeon, Seoung-Ki Lee, Jeong-Seok Nam, Kyusun Kim, Qiang Zhang, Esko I. Kauppinen, Shigeo Maruyama\*, Phillip Lee\*, Il Jeon\**

## Supporting Information

**Foldable Perovskite Solar Cells Using Carbon Nanotube-Embedded Ultrathin Polyimide Conductor**

*Jungjin Yoon, Unsoo Kim, Yongseok Yoo, Junseop Byeon, Seung-Ki Lee, Jeong-Seok Nam, Kyusun Kim, Qiang Zhang, Esko I. Kauppinen, Shigeo Maruyama\*, Phillip Lee\*, Il Jeon\**

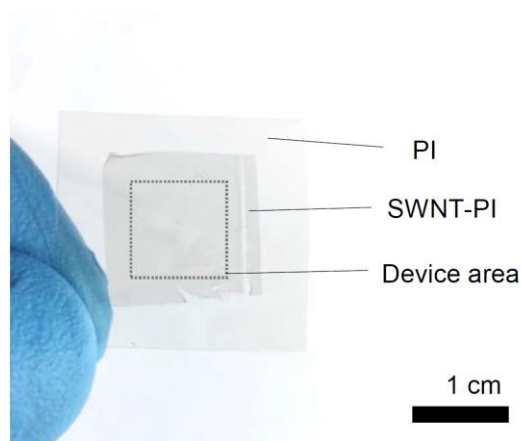

**Figure S1.** Digital photograph of the SWNT-PI conductor.

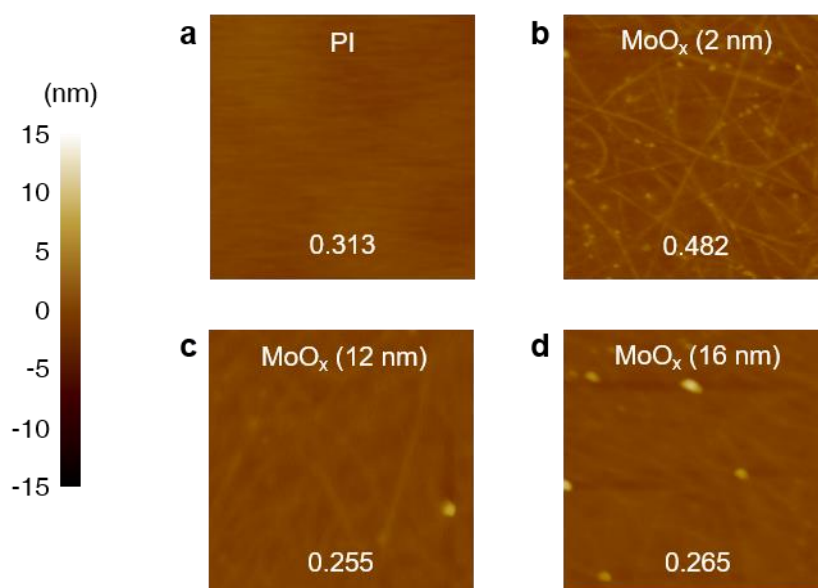

**Figure S2.** AFM topography images of (a) PI film, (b) MoO<sub>x</sub> (2 nm)/SWNT-PI, (c) MoO<sub>x</sub> (12 nm)/SWNT-PI, and (d) MoO<sub>x</sub> (16 nm)/SWNT-PI.

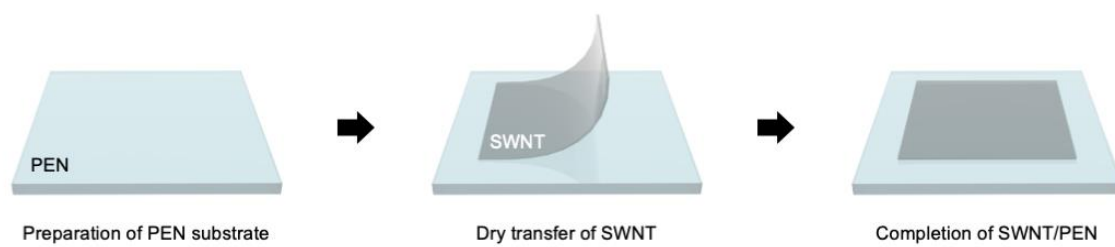

**Figure S3.** Schematic illustration of SWNT/PEN substrate preparation.

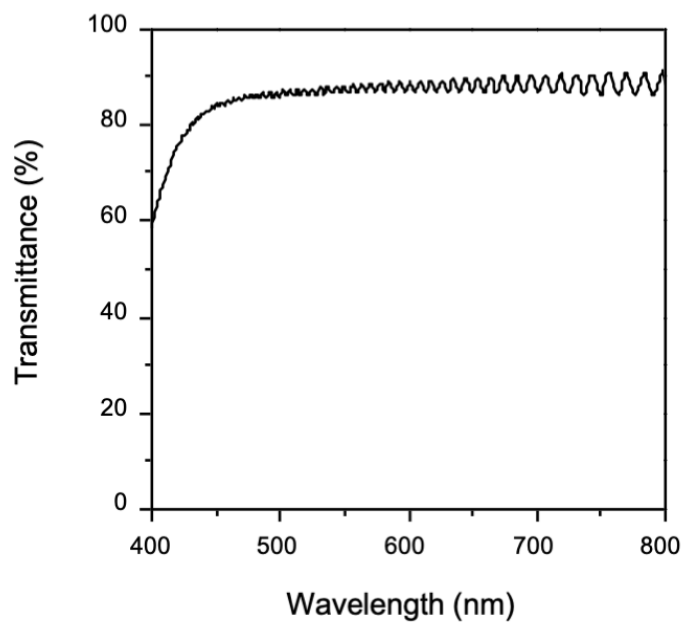

**Figure S4.** Optical transmittance spectrum of the PI film.

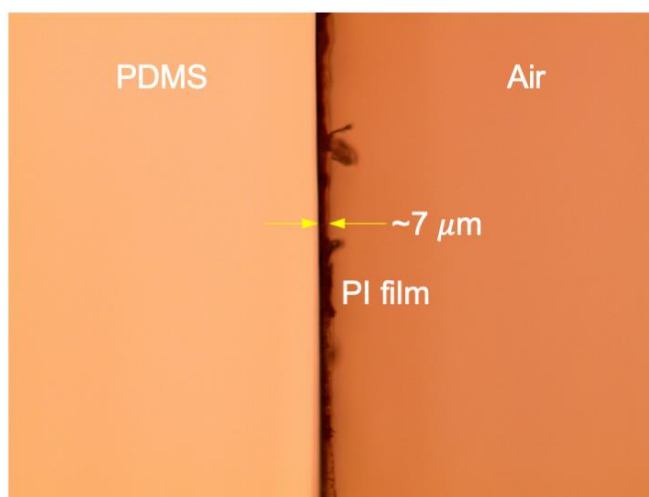

**Figure S5.** Cross-sectional optical microscope image of the PI film attached on a PDMS substrate.

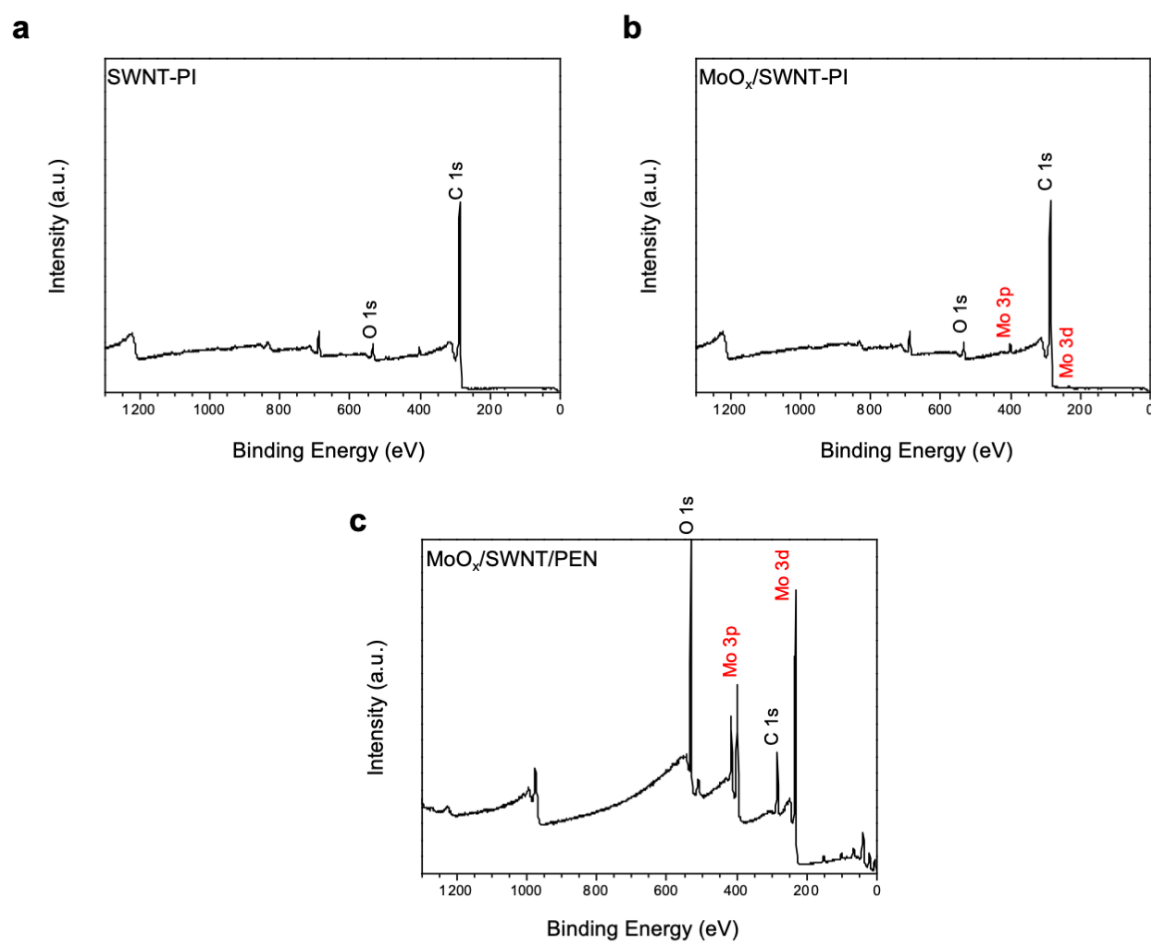

**Figure S6.** XPS spectra of different conductor configurations (a) SWNT-PI, (b) MoO<sub>x</sub>/SWNT-PI, and (c) MoO<sub>x</sub>/SWNT/PEN (peak positions of O 1s, C 1s, Mo 3p, and Mo 3d are indicated)

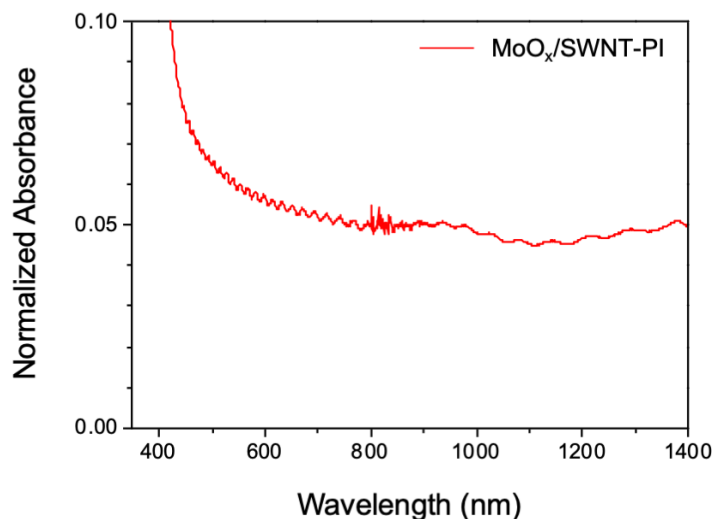

**Figure S7.** Normalized absorbance spectrum of the ultrathin conductor. Fluctuations can be seen over the entire wavelength range due to optical interference of the thin substrate.

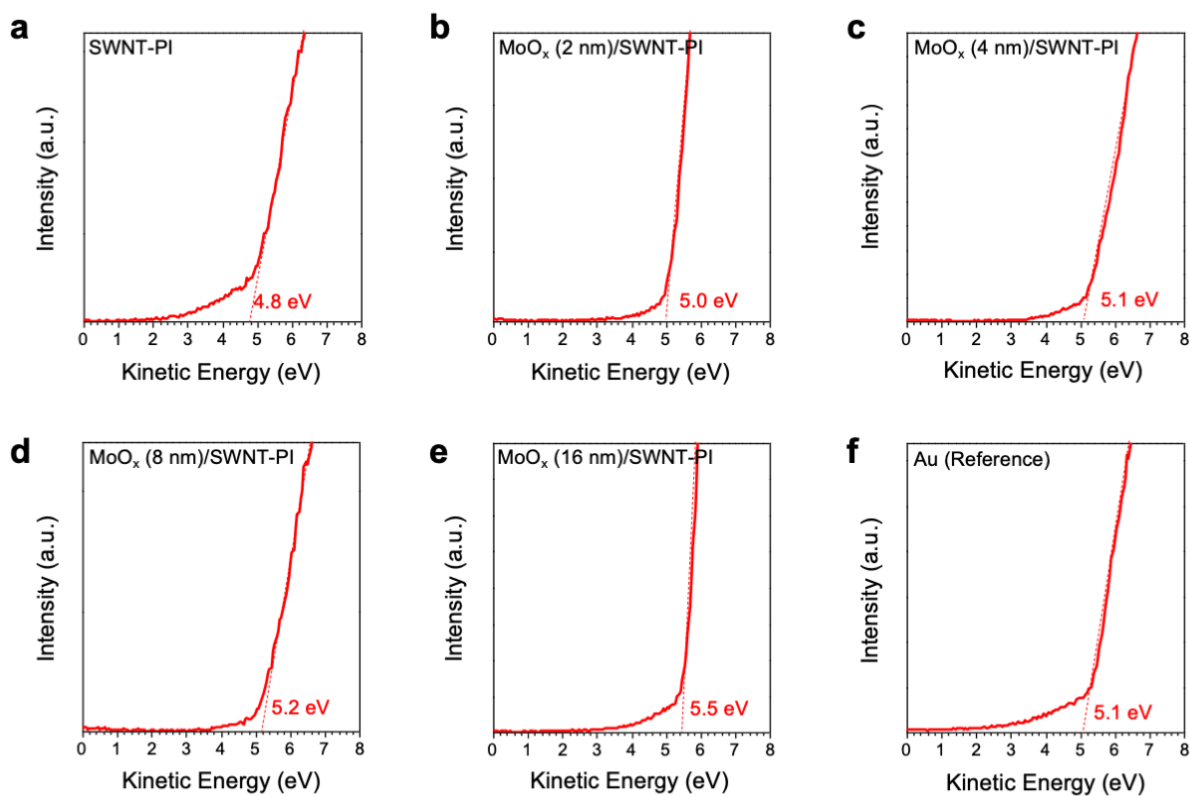

**Figure S8.** UPS spectra (a) SWNT-PI, (b) MoO<sub>x</sub> (2 nm)/SWNT-PI, (c) MoO<sub>x</sub> (4 nm)/SWNT-PI, (d) MoO<sub>x</sub> (8 nm)/SWNT-PI, (e) MoO<sub>x</sub> (16 nm)/SWNT-PI, and (f) reference Au film.

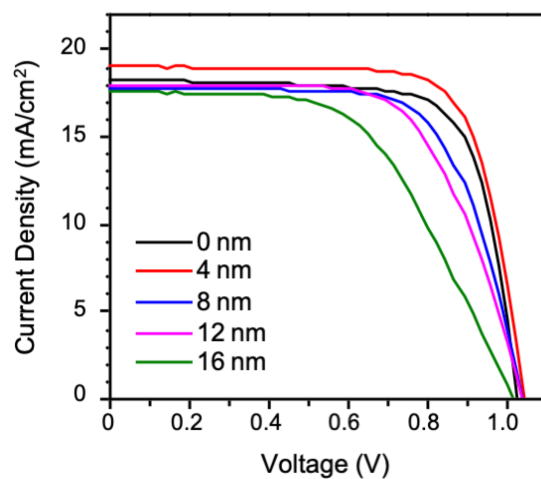

**Figure S9.**  $J$ - $V$  curves of perovskite solar cells employing  $\text{MoO}_x/\text{SWNT-PI}$  with different  $\text{MoO}_x$  thicknesses

**Table S1.** Summary of photovoltaic parameters of the  $\text{MoO}_x/\text{SWNT-PI}$ -based devices corresponding to Figure S9.

| $\text{MoO}_x$ thickness (nm) | $V_{oc}$ [V] | $J_{sc}$ [ $\text{mA cm}^{-2}$ ] | FF [%] | PCE [%] | Sheet resistance of SWNT-PI [ $\Omega \text{ sq.}^{-1}$ ] |
|-------------------------------|--------------|----------------------------------|--------|---------|-----------------------------------------------------------|
| 0                             | 1.03         | 18.2                             | 74.3   | 13.9    | 100.8                                                     |
| 4                             | 1.05         | 19.0                             | 74.9   | 14.9    | 82.0                                                      |
| 8                             | 1.04         | 17.8                             | 69.0   | 12.8    | 78.1                                                      |
| 12                            | 1.04         | 18.0                             | 64.7   | 12.1    | 49.0                                                      |
| 16                            | 1.02         | 17.6                             | 55.0   | 9.8     | 40.3                                                      |

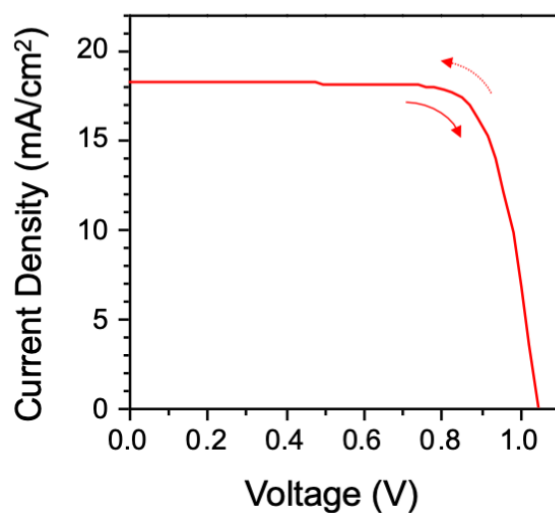

**Figure S10.**  $J$ - $V$  curves of a foldable PSC employing a SWNT-PI conductor with 4-nm-thick  $\text{MoO}_x$  layer obtained under different voltage sweep directions.

**Table S2.** Photovoltaic parameters of an ultrathin PSC measured under different voltage sweep directions corresponding to Figure S10.

| Scan Direction | $V_{oc}$ [V] | $J_{sc}$ [ $\text{mA cm}^{-2}$ ] | FF [%] | PCE [%] |
|----------------|--------------|----------------------------------|--------|---------|
| Reverse        | 1.04         | 18.3                             | 77.6   | 14.9    |
| Forward        | 1.04         | 18.3                             | 77.3   | 14.8    |

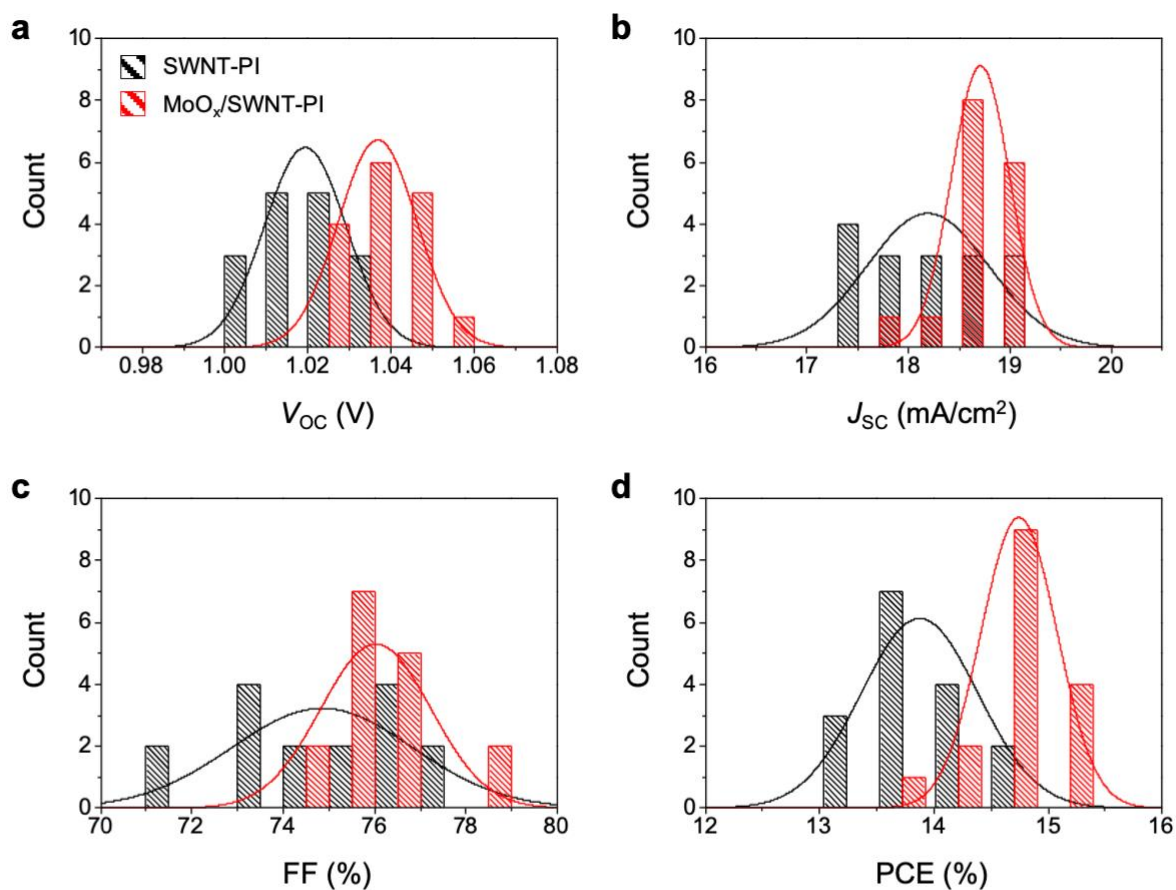

**Figure S11.** Histograms of photovoltaic parameters: (a)  $V_{OC}$ , (b)  $J_{SC}$ , (c) FF, and (d) PCE

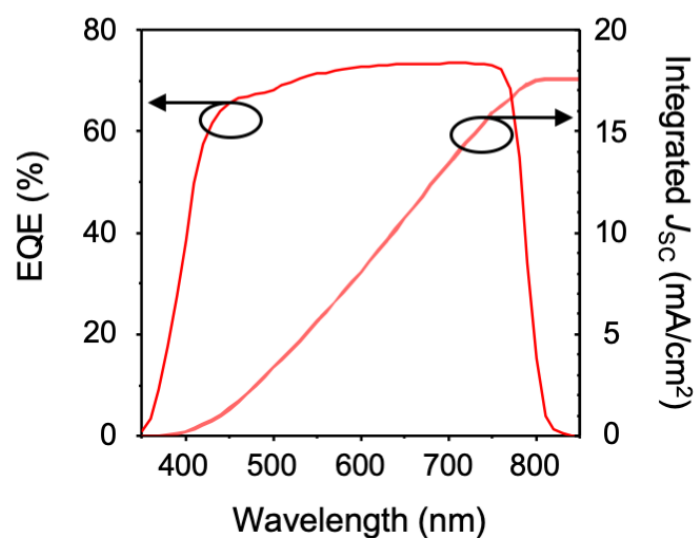

**Figure S12.** EQE data of the PSC fabricated on MoO<sub>x</sub>/SWNT-PI (red line,  $y_1$ -axis).  $J_{SC}$  calculated from the EQE curve is 17.6 mA cm<sup>-2</sup> (pink line  $y_2$ -axis).



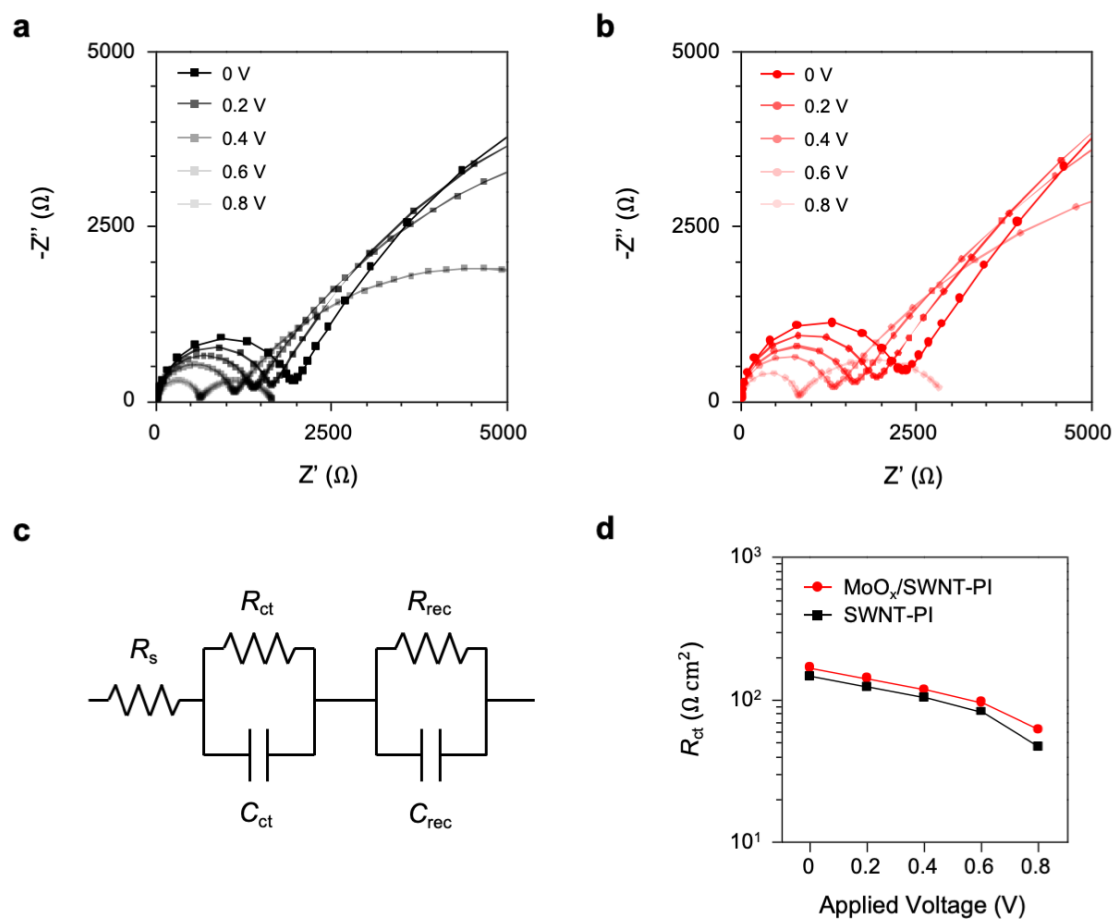

**Figure S13.** EIS analysis results. Nyquist plots of the devices (a) without and (b) with  $\text{MoO}_x$  doping obtained under different applied voltage conditions, (c) an equivalent circuit to fit the plots, and (d) charge transfer resistance ( $R_{ct}$ ) of the devices.

**Table S3.** Fitted parameters extracted from the Nyquist plots obtained by EIS analysis corresponding to Figure S13.

| Applied Voltage (V) | $R_s$ [ $\Omega \text{ cm}^2$ ] |                               | $R_{ct}$ [ $\Omega \text{ cm}^2$ ] |                               | $R_{rec}$ [ $\Omega \text{ cm}^2$ ] |                               |
|---------------------|---------------------------------|-------------------------------|------------------------------------|-------------------------------|-------------------------------------|-------------------------------|
|                     | SWNT-PI                         | $\text{MoO}_x/\text{SWNT-PI}$ | SWNT-PI                            | $\text{MoO}_x/\text{SWNT-PI}$ | SWNT-PI                             | $\text{MoO}_x/\text{SWNT-PI}$ |
| 0                   | 1.61                            | 1.00                          | 146.48                             | 168.48                        | 1371.86                             | 2945.36                       |
| 0.2                 | 1.57                            | 1.02                          | 123.63                             | 141.18                        | 1210.01                             | 2329.70                       |
| 0.4                 | 1.56                            | 1.02                          | 103.66                             | 118.01                        | 1020.08                             | 1739.56                       |
| 0.6                 | 1.56                            | 1.04                          | 82.91                              | 96.17                         | 541.24                              | 1030.93                       |
| 0.8                 | 1.60                            | 1.13                          | 47.01                              | 61.94                         | 82.21                               | 169.03                        |

**Table S4.** Hall measurement data for SWNT-PI conductors

|                              | <i>Bulk concentration</i><br>[ $\text{cm}^{-3}$ ] | <i>Conductivity</i><br>[ $\text{S cm}^{-1}$ ] | <i>Mobility</i><br>[ $\text{cm}^2 \text{V}^{-1} \text{s}^{-1}$ ] |
|------------------------------|---------------------------------------------------|-----------------------------------------------|------------------------------------------------------------------|
| SWNT                         | $8.21 \times 10^{20}$                             | 101.6863                                      | 1.002483                                                         |
| MoO <sub>x</sub> -doped SWNT | $2.46 \times 10^{21}$                             | 191.9417                                      | 1.254625                                                         |

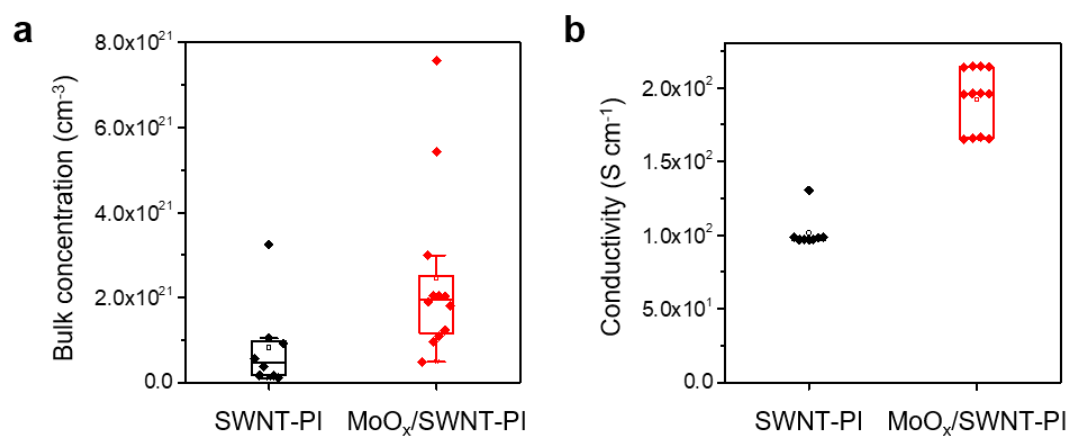**Figure S14.** Box charts for (a) bulk concentration and (b) conductivity of the SWNT-PI conductors without and with MoO<sub>x</sub> doping

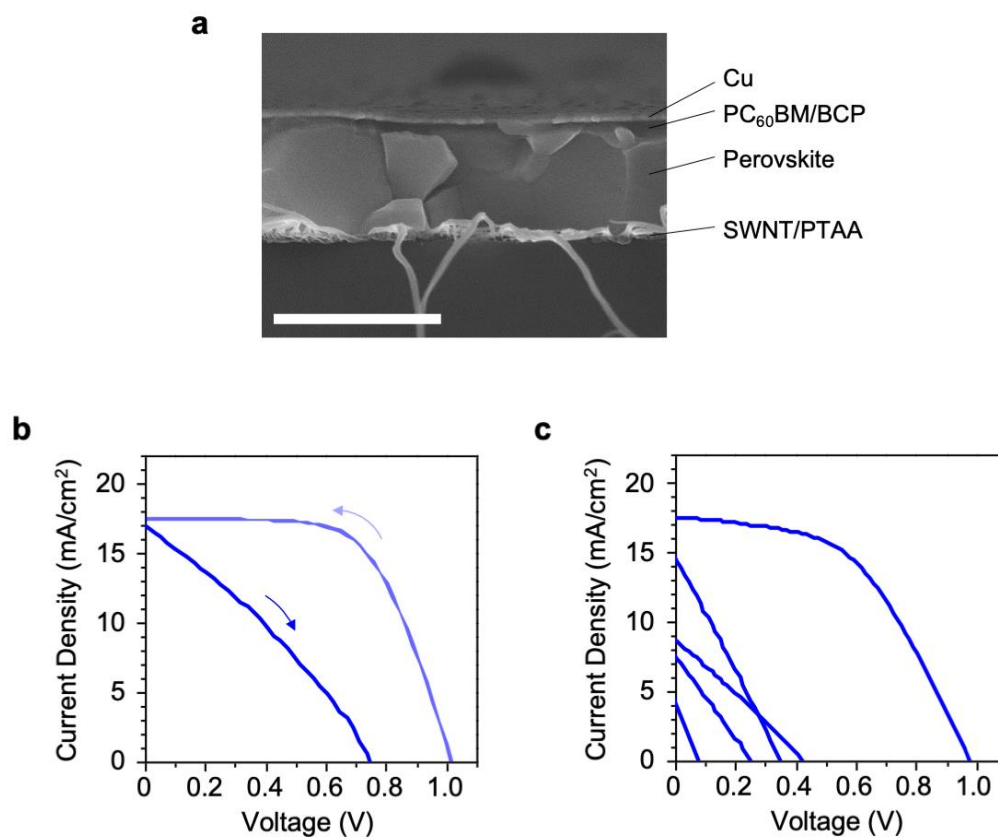

**Figure S15.** (a) Cross-sectional SEM image of a device fabricated on SWNT/PEN (scale bar: 1  $\mu\text{m}$ ), (b)  $J$ - $V$  curves of the same device measured with different voltage sweep directions, and (c)  $J$ - $V$  curves of the SWNT/PEN-based devices showing low reproducibility.

**a. SWNT-embedded PI (SWNT-PI)**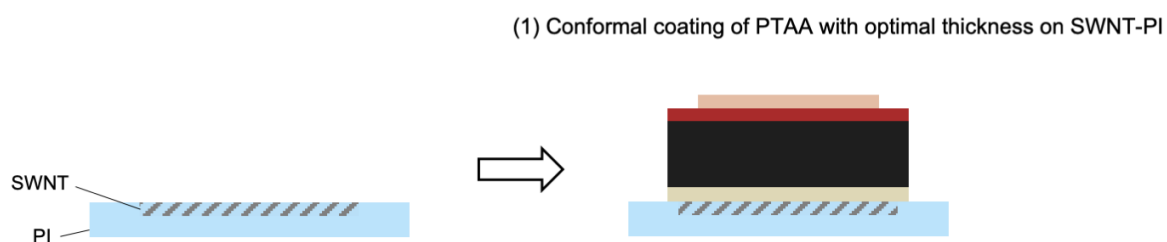**b. SWNT-deposited PEN (SWNT/PEN)**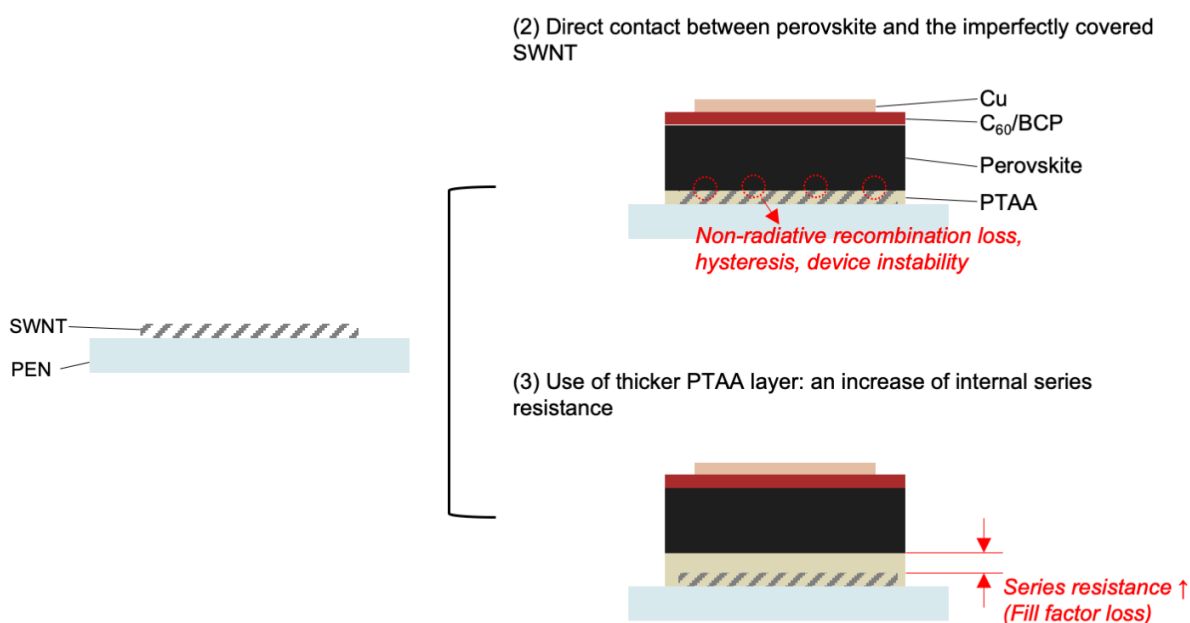

**Figure S16.** (a) Schematic illustration of the device based on SWNT-embedded PI, and (b) an explanatory depiction of the performance loss of the devices based on SWNT/PEN.

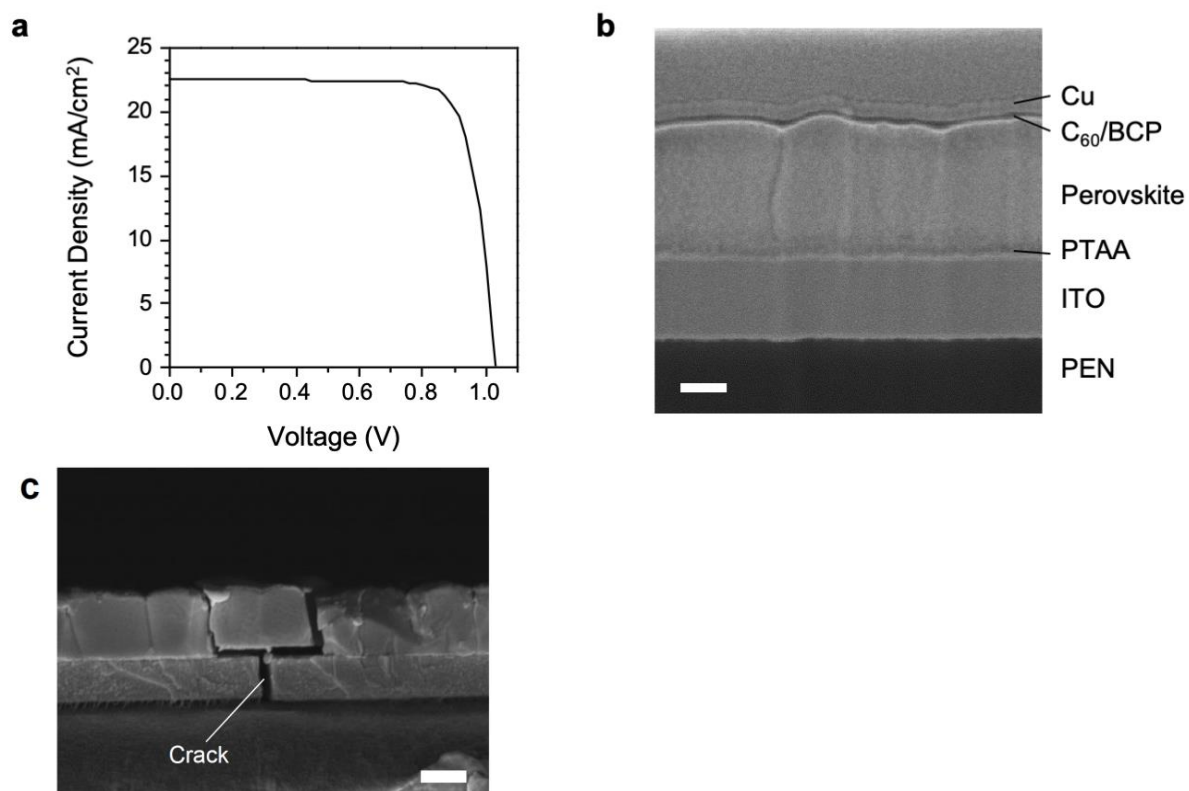

**Figure S17.** (a)  $J$ - $V$  curve of the ITO-based flexible PSC, (b) a cross-sectional FIB-SEM image of the ITO-based device (scale bar: 200 nm), and (c) cross-sectional SEM image of the device after 1,000 bending cycles with  $R_{\text{bending}} = 4$  mm (scale bar: 400 nm)

**Table S5.** Photovoltaic parameters of the ITO-based flexible PSC corresponding to Figure S17a.

| $V_{\text{oc}}$ [V] | $J_{\text{sc}}$ [mA cm <sup>-2</sup> ] | FF [%] | PCE [%] |
|---------------------|----------------------------------------|--------|---------|
| 1.03                | 22.5                                   | 79.8   | 18.5    |

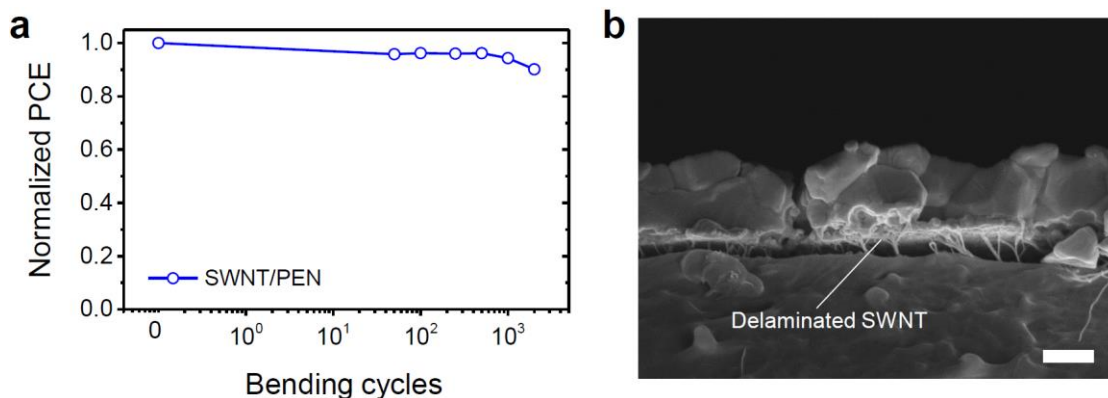

**Figure S18.** (a) Normalized PCE of the flexible PSC based on SWNT/PEN as a function of bending cycles with  $R_{\text{bending}} = 4$  mm, and (b) cross-sectional SEM image of the device after 2,000 cycles under the same test conditions (scale bar: 400 nm).

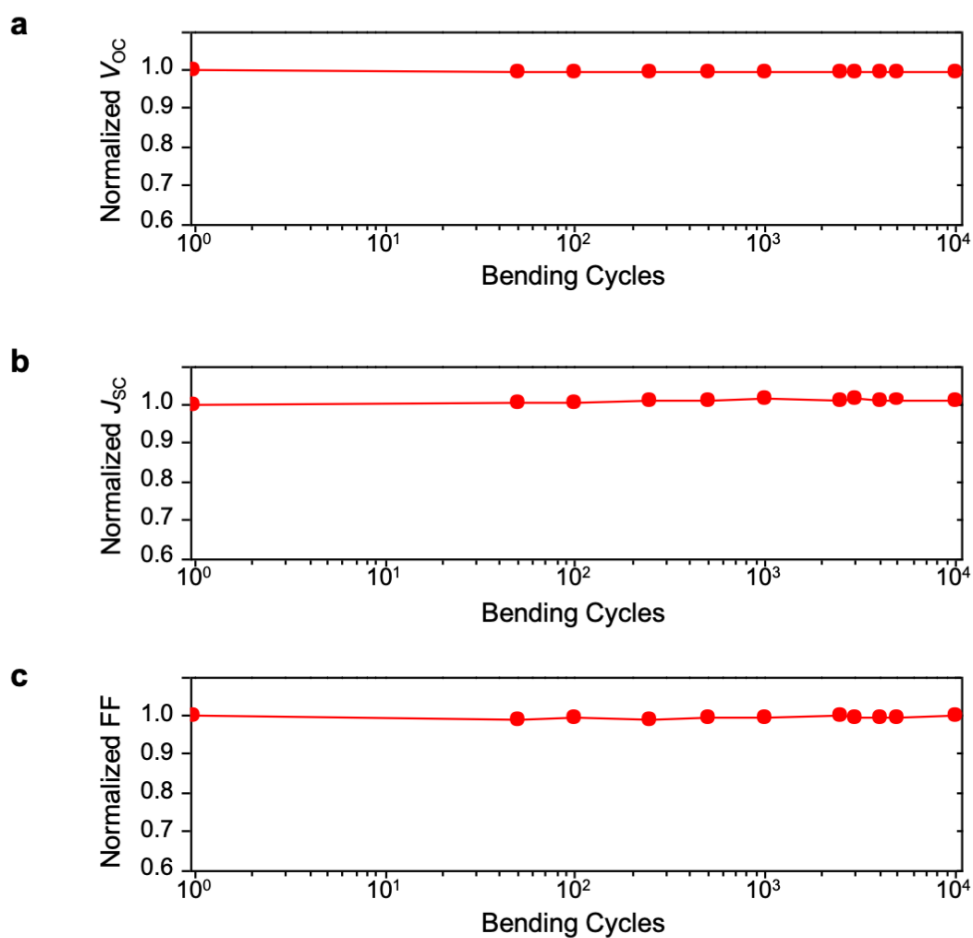

**Figure S19.** Normalized photovoltaic parameters of the foldable PSCs employing the MoO<sub>x</sub>/SWNT-PI conductor as a function of folding cycles with a  $R_{\text{folding}}$  of 0.5 mm: (a)  $V_{oc}$ , (b)  $J_{sc}$ , and (c) FF.

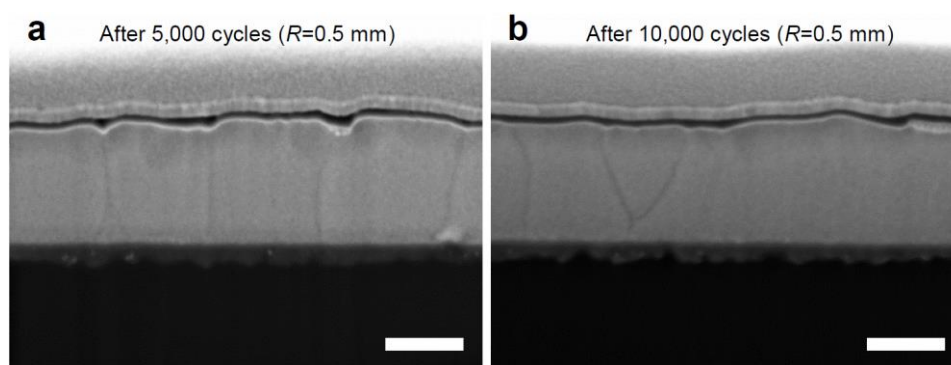

**Figure S20.** FIB-assisted cross-sectional SEM images of the SWNT–PI-based devices after (a) 5,000 cycles, and (b) 10,000 cycles with a folding radius of 0.5 mm (scale bars: 400 nm).

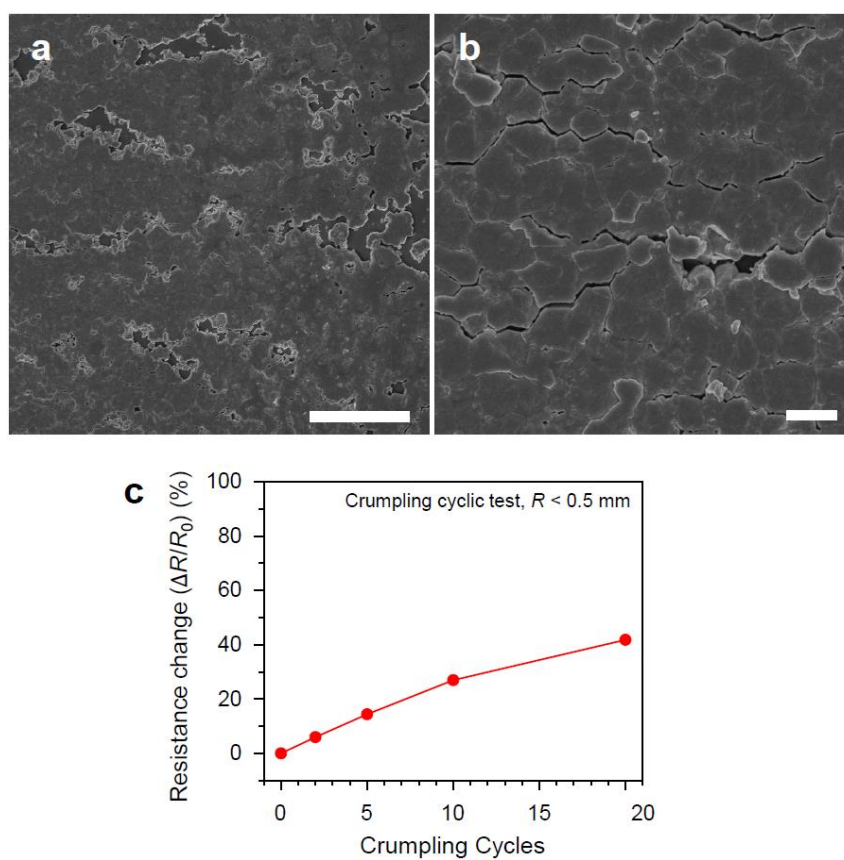

**Figure S21.** Top-view SEM images of the perovskite film coated on the SWNT–PI conductor after the crumpling test: (a) low-magnification image (scale bar: 8  $\mu\text{m}$ ) and (b) high-magnification image (scale bar: 1  $\mu\text{m}$ ). (c) Change in electrical resistance of the SWNT–PI conductor over crumpling cycles.
